## Genetically refactored *Agrobacterium*-mediated transformation

**Authors:** Mitchell G. Thompson<sup>1,2,\*</sup>, Liam D. Kirkpatrick<sup>1,2,3</sup>, Gina M. Geiselman<sup>4,5</sup>, Lucas M. Waldburger<sup>1,2,6</sup>, Allison N. Pearson<sup>1,3,7</sup>, Matthew Szarzanowicz<sup>1,2,3</sup>, Khanh M. Vuu<sup>1,2</sup>, Kasey Markel<sup>1,2,3</sup>, Niklas F. C. Hummel<sup>1,2,8</sup>, Dennis D. Suazo<sup>3</sup>, Claudine Tahmin<sup>3</sup>, Ruoming Cui<sup>1,2</sup>, Shuying Liu<sup>1,2</sup>, Jasmine Cevallos<sup>1,2</sup>, Hamreet Pannu<sup>1,2</sup>, Di Liu<sup>4,5</sup>, Jennifer W. Gin<sup>1,4,7</sup>, Yan Chen<sup>1,4,7</sup>, Christopher J. Petzold<sup>1,4,7</sup>, John M. Gladden<sup>1,4,5</sup>, Jay D. Keasling<sup>1,6,7,9,10,11,12</sup>, Jeff H. Chang<sup>13</sup>, Alexandra J. Weisberg<sup>13</sup>, Patrick M. Shih<sup>1,2,3,14,\*</sup>

### Affiliations:

<sup>1</sup>Joint BioEnergy Institute, 5885 Hollis Street, Emeryville, CA 94608, USA.

<sup>2</sup>Environmental Genomics and Systems Biology Division, Lawrence Berkeley National Laboratory, Berkeley, California, USA

<sup>3</sup>Department of Plant and Microbial Biology, University of California, Berkeley, CA 94720, USA

<sup>4</sup>DOE Agile Biofoundry, 5885 Hollis Street, Fourth Floor, Emeryville, CA, 94608, USA.

<sup>5</sup>Sandia National Laboratories, Livermore, CA, USA.

<sup>6</sup>Department of Bioengineering, University of California, Berkeley, California, USA

<sup>7</sup>Biological Systems & Engineering Division, Lawrence Berkeley National Laboratory, Berkeley, CA 94720, USA

<sup>8</sup>Department of Biology, Technische Universität Darmstadt, Darmstadt, Germany

<sup>9</sup>Department of Chemical and Biomolecular Engineering, University of California, Berkeley, CA 94720, USA

<sup>10</sup>QB3, University of California, Berkeley, Berkeley, CA, USA

<sup>11</sup>Center for Biosustainability, Danish Technical University

<sup>12</sup>Center for Synthetic Biochemistry, Institute for Synthetic Biology, Shenzhen Institutes for Advanced Technologies, Shenzhen, China

<sup>13</sup>Department of Botany and Plant Pathology, Oregon State University, Corvallis, Oregon, USA

<sup>14</sup>Innovative Genomics Institute, Berkeley, California, USA

\*Correspondence should be addressed to either Mitchell G. Thompson ([mthompson@lbl.gov](mailto:mthompson@lbl.gov)) or Patrick M. Shih ([pmsih@berkeley.edu](mailto:pmsih@berkeley.edu))

## 35 **Abstract**

36 Members of *Agrobacterium* are costly plant pathogens while also essential tools for plant  
37 transformation. Though *Agrobacterium*-mediated transformation (AMT) has been heavily  
38 studied, its polygenic nature and its complex transcriptional regulation make identifying the  
39 genetic basis of transformational efficiency difficult through traditional genetic and bioinformatic  
40 approaches. Here we use a bottom-up synthetic approach to systematically refactor the tumor-  
41 inducing plasmid, wherein the majority of AMT machine components are encoded, into a  
42 minimal set of genes capable of plant and fungal transformation that is both controllable and  
43 orthogonal to its environment. We demonstrate that engineered vectors can be transferred to  
44 new heterologous bacteria, enabling them to transform plants. Our reductionist approach  
45 demonstrates how bottom-up engineering can be used to dissect and elucidate the genetic  
46 underpinnings of complex biological traits, and may lead to the development of strains of  
47 bacteria more capable of transforming recalcitrant plant species of societal importance.

## 48

## 49 **Introduction**

50 The genetic basis of pathogenesis is challenging to study due to its highly polygenic  
51 nature as well as it being influenced by both host and environmental factors <sup>1</sup>. While advances  
52 in comparative and functional genomics have generated myriad hypotheses on how virulence  
53 and adaptations to specific hosts evolve <sup>2,3</sup>, it is still challenging to isolate and validate specific  
54 genetic features that determine these traits <sup>4</sup>. In an ideal system, one would be able to  
55 systematically evaluate and build a holistic understanding of how each gene contributes and  
56 influences virulence. However, epistatic effects often complicate the conclusions drawn from  
57 traditional top-down approaches that rely solely on knockouts and complementation <sup>5</sup>.

58 As an alternative bottom-up approach, synthetic biology enables the introduction of  
59 synthetic regulatory control on a defined set of genetic elements. This is crucial for two major  
60 reasons. First, the development of minimal, controllable systems allows for specific hypotheses  
61 to be tested to better understand how evolution has solved a myriad of problems. Second, this  
62 knowledge gained allows for subsequent data-guided engineering to optimize and leverage the  
63 system for biotechnological purposes. Such a strategy has been widely implemented in  
64 reconstituting relatively linear metabolic pathways <sup>6,7</sup>, but apart from a few notable exceptions, it  
65 has rarely been applied to more complex biological phenomena because of the numerous and  
66 tremendous intrinsic challenges associated with building up complex biological traits in a  
67 reductionist manner <sup>8,9</sup>. To perform “genetic refactoring” one must identify the genes necessary  
68 and sufficient for a given biological process <sup>5</sup>, as well as have the appropriate genetic tools

69 applicable to the organism of study<sup>10</sup>. Given these significant hurdles, many initial designs from  
70 genetic refactoring often perform poorly compared to their native system, but nonetheless offer  
71 unique insights into the underlying complexities facets of biological traits<sup>9,11</sup>.

72 A problem unique to studying the genetic bases of pathogenesis is that any synthetic  
73 regulatory elements utilized must also be robust *in situ*, *i.e.*, in the context of the various  
74 environments that the pathogen faces during infection, where very few genetic toolkits have  
75 been rigorously validated. Despite these challenges, work with both plant- and mammalian-  
76 associated bacteria has demonstrated that synthetic genetic constructs can be introduced to  
77 promote non-native interactions<sup>12,13</sup>, indicating the feasibility of a complete synthetic refactoring  
78 of pathogenesis. Nonetheless, genetically recapitulating complex biological phenomena within a  
79 host-associated environment has largely remained out of reach.

80 Plant pathogenic members of *Agrobacterium* and *Rhizobium* (hereafter collectively  
81 referred to as *Agrobacterium tumefaciens*) are capable of causing crown gall or hairy root  
82 diseases and have been extensively studied due to their unique mechanisms of virulence.  
83 Virulence involves genetic transformations of eukaryotic hosts, which has been leveraged for  
84 many critical biotechnological uses, *e.g.*, plant transgenesis<sup>14</sup>. Central to virulence is an  
85 oncogenic tumor-inducing plasmid (pTi) that carries a “Transfer DNA” (T-DNA) and *vir* genes.  
86 The hallmark of *A. tumefaciens* virulence is the transfer of a protein-conjugated, single-stranded  
87 DNA molecule into host cells and integration of the DNA into the genome. When genes from this  
88 T-DNA are expressed in the genetically modified plant cell, the gene products synthesize  
89 phytohormones that result in the formation of a tumor. The infecting bacterial population is  
90 hypothesized to gain a fitness advantage in the tumor because of access to novel nutrients,  
91 which are also encoded for on the T-DNA<sup>15</sup>. When scientists domesticated virulence by  
92 swapping the tumorigenic genes within the T-DNA region with genes of interest, a new era of  
93 plant genetics was ushered in. Today the T-DNA borders and genetic payloads to be delivered  
94 are most often housed on a smaller plasmid referred to as a binary vector, enabling easy  
95 genetic manipulation through *Agrobacterium*-mediated transformation (AMT) of multitudes of  
96 plant and fungal species<sup>16–18</sup>. However, many agriculturally important crops still remain difficult  
97 to transform<sup>19</sup>. Thus, there remains a tremendous imperative to develop novel strains of  
98 *Agrobacterium* that will enable scientists to expand the genetic potential of plants.

99 Our basic understanding of AMT and nearly all of the engineered agrobacterial strains  
100 used for AMT are derived from a limited number of *A. tumefaciens* strains and pTi variants<sup>20</sup>.  
101 Yet, it has long been recognized that interactions among strains, Ti plasmids, and host species  
102 influence the efficiency of AMT<sup>21</sup>. By mining this natural diversity, strains with improved plant

103 transformation properties for different plant species have previously been developed<sup>22,23</sup>. More  
104 recently, groups have developed strains that contain additional *vir* alleles, harbored either on the  
105 binary vector (superbinary vectors) or on an additional stand-alone plasmid (ternary vectors)<sup>24–</sup>  
106 <sup>26</sup>. These strains demonstrate that altering the regulation of *vir* genes can enhance  
107 transformation of otherwise recalcitrant plants<sup>24–26</sup>. Precisely how these tripartite interactions  
108 influence transformation efficiency remains largely unknown. The high number of possible  
109 genetic interactions required for AMT complicates research efforts at improving transformation  
110 by *A. tumefaciens*. Complicating studies is that oncogenic plasmids vary in the composition and  
111 sequence of *vir* genes, the regulation of these genes<sup>27,28</sup>, and that chromosomal genes  
112 implicated in virulence vary in sequence across agrobacterial strains<sup>29–31</sup>. Furthermore, the  
113 impact of changes in expression level between different *vir* genes is somewhat masked by a  
114 master regulator, VirA/G, which controls the expression of all known *vir* genes<sup>30–32</sup>. This  
115 epistatic regulatory schema makes it difficult to evaluate whether differences in virulence are a  
116 consequence of the presence of a specific *vir* gene or its strength of expression<sup>33,34</sup>. Thus, to  
117 fully capture the impact of these many individual genetic variables involved in AMT, a bottom-up  
118 synthetic genetic approach is required to precisely control genetic interactions and  
119 systematically evaluate the contribution of each gene to transformation. However, due to the  
120 sheer size of combinatorial genetic space within pTi that can be explored and the technical  
121 challenges associated with refactoring complex biological phenomena *in planta*, no such effort  
122 has been reported.

123         Despite the many technical challenges associated with engineering synthetically  
124 encoded AMT, a deeper understanding of this complex process may elucidate molecular  
125 constraints to the transformation of plants. Here we overcome these challenges by 1)  
126 developing a set of genetic tools that allow for the reliable control of agrobacterial gene  
127 expression within the plant environment, in order to 2) quantitatively characterize the genetic  
128 determinants underlying AMT, to ultimately 3) design synthetic vectors, divorced from native  
129 regulation, capable of plant transformation. This work represents a critical first step in better  
130 understanding AMT as we lay the framework for understanding highly specific genotype-to-  
131 phenotype connections in a complex host-microbe interaction.

132

## 133 **Results and Discussion**

134

135 Developing a genetic toolkit to control bacterial gene expression *in planta*

136 A recurring challenge in synthetic biology has been translating genetic circuits developed  
137 *in vitro* into more heterogeneous environments *in situ*. Environmental changes can have  
138 dramatic impact on genetically engineered organisms, as demonstrated in scaleups to large  
139 fermentative tanks or living medicines in patients<sup>35,36</sup>. Many *in vitro* synthetic biology designs  
140 take advantage of small-molecule inducible promoters, which offer a range of expression  
141 options from a single design, compared to static expression levels from a single constitutive  
142 promoter. However, dynamic environments such as plant tissue may interfere with inducible  
143 promoter systems by making signaling molecules biologically unavailable through degradation  
144 or sequestration, thus dramatically limiting their potential usefulness. Recent work by multiple  
145 groups [have](#) characterized inducible promoters in *Agrobacterium*, though not all were evaluated  
146 while the bacteria was *in planta*; moreover, there has been a dearth of well characterized  
147 constitutive promoters in *Agrobacterium*<sup>37-39</sup>.

148 To better understand how to control bacterial gene expression within plants, we  
149 evaluated the activity of 16 synthetic constitutive, and 4 inducible promoters in bacterial cells  
150 grown in rich media<sup>40</sup>, as well as infiltrated into the leaf tissue of *Nicotiana benthamiana* and  
151 *Arabidopsis thaliana*. In both plants, bacterial constitutive promoter activity correlated highly  
152 between leaf tissues, and between observed *in vitro* activity (**Figure 1A, Figure S1**). We then  
153 choose five constitutive promoters with a range of expression strengths ( $P_{J23114}$ ,  $P_{J23117}$ ,  $P_{J23101}$ ,  
154  $P_{J23100}$ , and  $P_{J23111}$ ) to complement a *virE12* deletion mutation in the common *Agrobacterium*  
155 *fabrum* (formerly *A. tumefaciens*) laboratory strain GV3101, which is derived from *A. fabrum*  
156 C58. Previous work using inducible promoters showed that transformation of tobacco was highly  
157 sensitive to *virE12* expression<sup>39</sup>. Using transiently expressed GFP from a medium strength  
158 plant promoter in *N. benthamiana* as a measure of transformation<sup>41</sup>, we observed that all  
159 promoters stronger than the weakest,  $P_{J23114}$ , were able to complement leaf transformation back  
160 to wild-type levels (**Figure 1B**). Proteomics analysis of the  $\Delta virE12$  complementation strains  
161 confirmed that expression of VirE12 correlated with RFP expression from the same promoters  
162 (**Figure 1C**). These data reveal that relatively weak constitutive promoters may be sufficient to  
163 reconstitute *vir* gene expression from pBBR1 origin plasmids.

164 Inducible promoters enable the dynamic control of gene expression strength, and thus  
165 could reduce the number of genetic designs needed to evaluate the impact of gene expression  
166 on AMT. Therefore, we then evaluated the expression of RFP from four inducible promoter  
167 systems ( $P_{LacO}$ ,  $P_{TetR}$ ,  $P_{Jungle\ Express}$ , and  $P_{NahR}$ ) in culture media as well as in *N. benthamiana* and  
168 *A. thaliana* leaves, where the inducing compound was mixed with a bacterial suspension before  
169 infiltration into leaf tissue. While each of these systems displayed inducible expression in culture

170 media (**Figure S2**), only  $P_{LacO}$  and  $P_{TetR}$  showed consistent inducibility in both host plant species  
171 (**Figures 1D-G, Figure S3**). Conversely, the  $P_{Jungle\ Express}$  promoter showed poor induction in  
172 both plant species, and  $P_{NahR}$  was expressed even in the absence of an added inducer within *A.*  
173 *thaliana* leaf tissue. These results demonstrate the importance of validating each promoter in its  
174 intended environment. For example, though functional *in vitro*,  $P_{Jungle\ Express}$  performed extremely  
175 poorly *in planta*. Similar results were observed for  $P_{Jungle\ Express}$ , as it is possible the crystal violet  
176 inducer may be rapidly bound to plant tissue and thus not biologically available. Conversely, the  
177 salicylic acid inducer of  $P_{NahR}$  can be endogenously produced by plants as an immune response  
178 to pathogens such as *A. fabrum*, and thus may not be ideal for exerting orthogonal control of  
179 gene expression within different plants <sup>42</sup>.

180 After testing all four promoter systems to complement a  $\Delta virE12$  mutation, only the LacI  
181 inducible promoter, with the highest amount of added ligand tested, was able to recover  
182 transformation back to wild type levels (**Figure 1D**). As  $P_{LacO}$  showed the best plant  
183 orthogonality and ability to complement a *virE12* mutation, further designs requiring inducibility  
184 utilized the IPTG inducible promoter. While proteomics from cultures indicated that the levels of  
185 VirE2 expressed from inducible promoters were similar to the constitutive promoters (**Figures**  
186 **1C-G**), the plant-specific utility of individual promoters suggests that they may be less useful for  
187 designing general functioning genetic circuits across plant environments.

188

### 189 A quantitative understanding of the genetic contributions to AMT

190 To systematically assess the contributions individual *vir* genes have on plant  
191 transformation, we developed a quantitative virulence assay to measure the efficiency of T-DNA  
192 transfer into plant cells. To accomplish this, we first generated internal, in-frame deletion  
193 mutants of known functional non-regulatory *vir* gene clusters in *A. fabrum* GV3101: *virB1-11*,  
194 *virC12*, *virD12*, *virD3*, *virD4*, *virD5*, *virE12*, *virE3*, *virF*, *virH1*, *virH2*, and *virK* (**Figure 2A**). Using  
195 a transient GFP expression assay in *N. benthamiana* leaves, we observed that deletion of *virB1-*  
196 *11*, *virC12*, *virD12*, *virD4*, or *virE12* resulted in over 90% reduction in transformation efficiency  
197 (**Figures 2B**). Furthermore, loss of *virD5*, *virE3*, *virH1*, *virH2*, or *virK* significantly reduced  
198 transformation efficiency compared to wild-type, while deletion of *virD3* or *virF* showed no  
199 significant reduction in transformation efficiency (**Figure 2B**). Plasmid complementation of  
200 these deletions using the relatively weak promoter  $P_{J23117}$  restored wild-type transformation  
201 efficiencies in all deletion strains except *virB1-11*, *virD4*, *virD5*, and *virK* (**Figure 2B**). These  
202 results thus serve as a benchmark that, for the first time, allow for relative comparison of *vir*  
203 gene importance in AMT.

204 To explore the effect of different expression levels on transformation efficiency, we then  
205 complemented each mutation with the inducible P<sub>LacO</sub> promoter. Three phenotypes were  
206 observed: 1) the *virB1-11*, *virC12*, *virD12*, and *virE12* complementation strains had increasing  
207 transformation efficiency with increased induction; 2) the *virD3*, *virD4*, and *virD5*  
208 complementation strains had decreasing transformation efficiency as induction increased; and  
209 3) the *virE3*, *virF*, *virH1*, *virH2*, and *virK* complementation strains showed no response to  
210 increasing induction (**Figure 2C, S4**). Some of the relative decrease in transformation observed  
211 as *virD5* expression increases may be due to toxicity to the bacterium; however, similar toxicity  
212 was not observed with increased expression of *virD3* or *virD4* (**Figure S5**). Previous work has  
213 shown that overexpression of *virD5* resulted in acute toxicity in eukaryotes, where it is localized  
214 to the nucleus, and may cause DNA damage<sup>43,44</sup>. Based on these results, we used constitutive  
215 promoters stronger or weaker than P<sub>J23117</sub> to tune and optimize the expression of each *vir* gene  
216 cassette (**Figure 2D**). Strong expression of *virD12* improved transformation compared to wild-  
217 type by 135%. These results are in line with previous reports that overexpression of *virD12*  
218 improves transformation<sup>45</sup>. Conversely, lower expression of *virD4* improved transformation 72%  
219 over wild-type. There was no significant improvement of transformation by increasing the  
220 expression of *virC12*, though expression from the stronger P<sub>J23100</sub> and P<sub>J23101</sub> promoters  
221 decreased transformation. Expression of *virD5* and *virK* from the weak P<sub>J23114</sub> promoter was  
222 able to restore wild-type level transformation efficiency. Overall, these results demonstrate that  
223 transformation efficiency is highly sensitive to the expression strength of nearly all *vir* genes we  
224 evaluated, necessitating precise tuning for optimal DNA transfer.

225 Unlike other gene clusters, which were all complemented back to at least wild-type  
226 levels of transformation, we were only able to achieve ~2% of wild-type transformation in a  
227  $\Delta$ *virB1-11* genetic background. Expressing *virB1-11* from the strong P<sub>J23101</sub> promoter improved  
228 transformation over complementation using P<sub>J23117</sub>. However, complementation from the  
229 strongest promoter tested, P<sub>J23111</sub>, resulted in a significant reduction in transformation,  
230 suggesting that high-level expression may be toxic to the bacterium. The *virB* operon encodes  
231 the type 4 secretion system (T4SS), and previous studies genetically reconstructing secretion  
232 systems demonstrated the difficulty associated with engineering efficient transport<sup>11</sup>,  
233 suggesting that engineering the T4SS may represent the bottleneck in engineering efforts.

234 In an attempt to improve *virB* complementation, we explored whether breaking the  
235 cluster into segments would improve our ability to complement the *virB* cluster. We knocked out  
236 *virB1-5* and *virB6-11* individually and attempted to complement these smaller mutations. Both of  
237 the smaller mutations predictably abolished transformation (**Figure S6A**). Using the P<sub>LacO</sub>

238 inducible promoter, *virB1-5* showed a linear improvement of transformation with increased IPTG  
239 concentrations. However, *virB6-11* complementation plateaued at the median inducer  
240 concentration tested, with the highest level of induction causing a sharp decrease in  
241 transformation (**Figure S6B**). The decrease in transformation is likely due to the extreme toxicity  
242 associated with *virB6-11* being expressed without the other T4SS genes, which greatly  
243 compromised growth (**Figure S6C**). Constitutive complementation assays revealed the optimal  
244 promoters for complementing these deletions were the middle strength  $P_{J23101}$  for *virB1-5* which  
245 yielded ~60% of wild-type transformation, and the relatively weak  $P_{J23117}$  for *virB6-11* which  
246 yielded ~25% complementation (**Figure S6D**). Based on this data we designed synthetic *virB1-*  
247 *11* complementation vectors that express *virB1-5* using three different promoters (weak- $P_{J23117}$ ,  
248 medium-  $P_{J23101}$ , and strong-  $P_{J23100}$ ), and *virB6-11* from the weak constitutive promoter,  $P_{J23117}$ ,  
249 with this cassette both downstream and upstream of *virB1-5* (**Figure S7A**).

250 However, none of these vectors could complement as well as when *virB1-11* was  
251 expressed in its entirety. The vectors driving *virB1-5* from the strong  $P_{J23100}$  performed  
252 particularly poorly (**Figure S7A**). To assess the performance of our synthetic complementation  
253 of *virB1-11* against the native  $P_{virB}$ , we cloned the entire *virB1-11* operon in addition to its  
254 intergenic upstream and downstream DNA into a promoterless vector backbone. While this  
255 vector was able to complement transformation above the  $\Delta virB1-11$  parent, it was still  
256 significantly less than both *virB1-11* expressed from  $P_{LacO}$ , as well as *virB1-11* driven from  
257  $P_{J23101}$  (**Figure S7B**). These results may suggest that the *virB* cluster and other *vir* genes must  
258 be expressed from the same vector for efficient transformation.

259

#### 260 Screening natural diversity to assess the impact of disparate *vir* gene homologs on AMT

261 In many synthetically engineered metabolic pathways, multiple homologs of an enzyme  
262 are often evaluated to identify the optimal design needed to enhance flux towards the final  
263 product. To take a similar approach, we sampled the natural diversity of agrobacteria and then  
264 systematically tested homologs of non-regulatory *vir* genes for their ability to potentially improve  
265 transformation efficiency. It has recently been shown that at least 9 distinct lineages of pTi/pRi  
266 plasmids exist across the diversity of agrobacteria<sup>46,47</sup>. (**Figure 3A**). To measure the effect  
267 allelic variation plays in plant transformation, we synthesized phylogenetically diverse alleles  
268 from each of the 9 pTi/pRi (**Table S1**) families and evaluated their ability to complement  
269 GV3101 deletion mutants of *virB1-11*, *virC12*, *virD12*, *virD4*, *virD5*, *virE12*, *virE3*, *virH1*, *virH2*,  
270 and *virF* in a tobacco transient expression system (**Figures 3B-K**).



271 Of these clusters, we identified replacement alleles of *virC12* (91% improvement), *virD4*  
272 (13% improvement), *virD5* (35% improvement), and *virE3* (76% improvement) that resulted in  
273 improved complementation compared to the wild-type allele (C58). For *virD5*, 4 out of 9 alleles  
274 improved upon the wild type (**Figure 3F**). For *virE3*, 4 out of 9 tested also improved  
275 transformation compared to the native strain (**Figure 3H**). However, for the critical *vir* genes –  
276 *i.e.*, *virC12* (**Figure 3C**), *virD12* (**Figure 3D**), and *virE12* (**Figure 3G**) – the majority of homologs  
277 significantly reduced transformation. These results suggest that while homologs exist that can  
278 potentially improve transformation rates, AMT relies on multiple interactions between *vir* genes.  
279 Co-evolution between *vir* genes may limit the ability of distantly related homologs from  
280 functioning with one another.

281 To more specifically test whether phylogenetic distance from the wild-type allele impacts  
282 the ability for a *vir* gene to function in a non-native system, we correlated phylogenetic distance  
283 to the ability of a homolog to complement the C58 deletion mutant. With the exception of *virE12*,  
284 there were no significant correlations between phylogenetic distance and ability to complement  
285 (**Figure S8**). Surprisingly, distantly related alleles were able to complement many of the *vir* gene  
286 mutants to the level of the wild-type allele. Many of the *vir* genes appear to be under purifying  
287 selection ( $d_N/d_S < 1$ ) across much of their coding sequence (**Figure S9**). This selective pressure  
288 may keep critical residues needed for protein-protein interactions intact across evolutionary  
289 time, but further analysis will be required to identify whether such residues exist.

290 Given that we identified multiple homologs across 4 *vir* gene clusters that could improve  
291 transformation, we then asked if these homologs could be combined to further improve  
292 transformation. To this end, we generated a suite of plasmids, called pLoki, that contained either  
293 the critical genes *virC12*, *virD12*, *virD4*, and *virE12* (pLoki1) or these critical genes with the  
294 addition of *virD5* and *virE3* (pLoki2) (**Figure S10A-C**). We constructed a total of 20 variants of  
295 both pLoki1 and pLoki2 that explored all possible combinations of both wild-type alleles (C58)  
296 and the alleles of *virC12*, *virD4*, *virD5*, and *virE3* that performed best from our initial screen  
297 under the control of promoters that optimally complemented deletions. These vectors were used  
298 to complement a deletion that spanned *virC2* to *virE3* in *A. fabrum* GV3101 (**Figure S10D**).

299 The pLoki1 variant containing all C58 alleles restored ~25% of wild-type transformation  
300 in a transient tobacco expression assay, whereas the pLoki2 variant containing all C58 alleles  
301 restored ~65% (**Figure S10E**). Across all pLoki variants, none that contained a non-native allele  
302 outperformed the pLoki plasmids that only contained wild-type genes (**Figure S10D**). Looking  
303 across pLoki variants, we observed that vectors containing *virD5* derived from pTiBo542 were  
304 significantly superior to those harboring the wild-type (**Figure S10F**), though the improvement

305 was relatively minimal. Strains that contained *virD4* from pTiBo542 or *virE3* from pTiT60/94,  
306 however, were both worse than strains with the corresponding wild-type allele (**Figure S10G-H**).  
307 Further understanding the molecular basis and evolutionary constraints in swapping *vir* genes  
308 may help direct future studies in harnessing the natural diversity of *vir* genes to improve AMT.

309

### 310 Engineering a synthetic pTi enables orthogonal control of AMT

311 To exert predictable phenotypic control over AMT, the genotypic and regulatory makeup  
312 of a synthetic pTi must be composed of a defined set of genes controlled by promoters that are  
313 orthogonal to regulatory influence exerted by the plant environment. Based on our quantitative  
314 assessment of *vir* gene importance for tobacco transformation (**Figure 2**) and using optimal  
315 promoters previously identified (**Figure 1**), we first sought to identify the minimal set of genetic  
316 elements capable of plant transformation. Our initial design (pDimples0) contained a minimal set  
317 of essential *vir* genes (*i.e.*, *virB1-11*, *virD12*, and *virD4*) based on both our findings and previous  
318 work, which expressed the *virB* genes as a single operon controlled by P<sub>LacO</sub>, and the other  
319 genes controlled by optimally determined constitutive promoters (**Figure 4A**). This vector was  
320 then introduced into *A. fabrum* C58C1, a strain of *A. fabrum* which has been cured of its pTi,  
321 also harboring a binary vector expressing GFP on the T-DNA.

322 When this strain was introduced into tobacco leaves, there was no measurable increase  
323 in GFP signal when compared to leaves infiltrated with *A. fabrum* C58C1 carrying only the  
324 binary vector (**Figure 4B**). To further explore the minimal genetic requirements, we then  
325 generated two additional variants, which added either critical genes *virC12* (pDimples0.5-  
326 *virC12*) or *virE12* (pDimples0.5-*virE12*) upstream of the *virB* cluster. While pDimples0.5-*virC12*  
327 was unable to achieve any measurable tobacco transformation, pDimples0.5-*virE12* generated  
328 GFP above the control (**Figure 4B**). This finding was corroborated by experiments which  
329 expressed a nuclear localized mScarlet from the T-DNA. C58C1 containing the minimal  
330 pDimples0.5-*virE12* were able to form bright nuclear fluorescence in tobacco leaves, indicating  
331 successful T-DNA transfer into plant nuclei (**Figure 4C**). These findings experimentally define a  
332 minimal set of genes required for AMT of tobacco leaves and a starting point for rational  
333 engineering of synthetic pTi vectors.

334 To iterate upon and further optimize this design, we added both *virC12* and *virE12*  
335 upstream of the *virB* cluster (pDimples1.0) which dramatically improved transformation  
336 efficiency to 6.3% of wild type (**Figure 4B-C**). We then sought to evaluate whether the addition  
337 of either effector *vir* genes *virE3* or *virD5*, both of which significantly decreased transformation  
338 when deleted in *A. fabrum* GV3101, could improve transformation compared to pDimples1.0.

339 Either gene was cloned in between *virC12* and *virB* clusters to generate pDimples1.5. While  
340 pDimples1.5-*virE3* improved transformation over pDimples1.0 to 8.3% of wild-type,  
341 pDimples1.5-*virD5* did not improve over pDimples1.0 (**Figure 4B**). When both *virE3* and *virD5*  
342 were added to create pDimples 2.0, transformation efficiency reached 9.1% of wild-type. While  
343 this was significantly improved from pDimples1.0, it was not significantly better than the addition  
344 of *virE3* alone (**Figure 4B**). These vectors were introduced into GV3101 with a deletion from  
345 *virA-virE3* constituting the majority of the *vir* genes and their essential positive regulators. When  
346 these complementation strains were compared to pDimples vectors harbored in C58C1, there  
347 was no significant difference in the transformation ability of strains with each vector (**Figure**  
348 **S11A**). This suggests that – at least in the context of transient expression within tobacco – other  
349 genes on pTi may not play a significant role in the transformation process.

350 Attempts to optimize the expression of *virB* via complementation assays showed that  
351  $P_{LacO}$  was an optimal choice to control the expression of the T4SS. The choice of the inducible  
352  $P_{LacO}$  also allowed us to control the magnitude of transformation with the amount of IPTG that  
353 was co-infiltrated (**Figure S11B**). As the ability of pDimples vectors to restore transformation  
354 was significantly less than that of the pLoki vectors (~10% versus 75% restoration of wild-type  
355 *A. fabrum* GV3101 transformation), we concluded that suboptimal expression of the T4SS was  
356 likely a limiting factor. A possible bottleneck could be the availability of *virD4* which acts as a  
357 bridge between VirD2-conjugated T-DNA and the rest of the T4SS.

358 As *virD4* acts in concert with the T4SS to extrude the T-DNA, we sought to see if *virD4*  
359 expression limited transformation by replacing the very weak  $P_{J23114}$  promoter with the slightly  
360 stronger  $P_{J23117}$  promoter. However, this resulted in a significant decrease in transformation,  
361 indicating the bottleneck exists elsewhere (**Figure S11C**). While no pDimples vector was able to  
362 restore wild-type level transformation to *A. fabrum* C58C1, pDimples1 and pDimples2  
363 outperformed any attempt to complement a *virB1-11* deletion. These results are consistent with  
364 our hypothesis that a specific ratio between the T4SS genes and other *vir* genes needs to be  
365 maintained for optimal transformation. Exploring this relationship further will likely be key in  
366 debottlenecking future engineering efforts.

367 Because *Agrobacterium* is also a critical tool for the transformation of many fungi<sup>48</sup>, we  
368 evaluated the ability of the pDimples vectors to transform the oleaginous yeast *Rhodospodium*  
369 *toruloides*. Unlike in tobacco, a small number of transformants were observed with pDimples0.5-  
370 *virC12* strains added, while no transformants were observed with pDimples0.5-*virE12* (**Figure**  
371 **4D**). This is consistent with reports that *virE12* is not as important for fungal transformation as it  
372 is for plant transformation<sup>49</sup>. While only 5% of wild type transformation efficiency was achieved

373 with pDimples1.0, the addition of *virD5* dramatically increased transformation efficiency to 40%  
374 of wild-type (**Figure 4D**). This is intriguing because while VirD5 has been shown to localize to  
375 the nucleus of fungi<sup>43</sup>, it was thought to be completely dispensable for fungal transformation<sup>49</sup>.  
376 Contrary to previous thought, it is likely that *virD5* has a far more fundamental role in AMT than  
377 simply as a determinant of host range. Moreover, the addition of *virE3* by itself did not improve  
378 transformation, nor did it improve transformation efficiency when added in combination with  
379 *virD5*. As with tobacco experiments, fungal transformation was dependent on the presence of  
380 IPTG to induce *virB1-11* expression (**Figure S11D**), with *R. toruloides* transformants being  
381 confirmed by colony PCR (**Figure S11E**). Our synthetic pTi with differing minimal sets of *vir*  
382 genes demonstrate how a bottom-up engineering approach can define how AMT of fungi and  
383 plants differ, offering new opportunities to further dissect the contributory role of each *vir* gene in  
384 fungal AMT.

385 To test whether a synthetic pTi is sufficient to impart AMT outside of its native host  
386 context, we sought to test our engineered designs in a bacterium beyond *A. fabrum*. To this end  
387 we introduced pDimples1.0 into *Rhizobium rhizogenes* D108/85, a non-pathogenic strain  
388 without a native pRi or pTi plasmid and diverged from *A. fabrum* ~200 million years ago<sup>46</sup>.  
389 When *R. rhizogenes* was infiltrated into tobacco leaves carrying a binary vector expressing  
390 nuclear-localized mScarlet, no red nuclei were observed (**Figure 4E**). Yet with the addition of  
391 pDimples1.0, red nuclei were observed that produced significantly more fluorescent signal than  
392 the parent strain (**Figure 4E, Figure S11F**). Together, our results demonstrate that the design  
393 and construction of synthetic pTi can be used to: 1) identify the core set of genes that are  
394 necessary and sufficient for AMT, 2) describe the contributory role of accessory *vir* genes, 3)  
395 divorce AMT from its native regulation, and 4) transfer this complex trait into other bacteria.

396

## 397 **Conclusion**

398 Here, we leveraged a comprehensive and quantitative understanding of each *vir* gene  
399 cluster to build synthetic pTi plasmids that define the minimal transferable set required for AMT  
400 of both plants and fungi. Optimization of this set will allow us to better understand host-  
401 specificity between natural strains of *Agrobacterium* and to engineer laboratory strains with  
402 superior transformation properties. Furthermore, our analysis of how allelic variation of *vir* genes  
403 impacts transformation suggests there are likely untapped genetic resources to improve AMT.  
404 Overall, this work will also serve to guide related research studying host-microbe interactions,  
405 specifically those of plant-associated bacteria. For example, recent research that developed  
406 minimized versions of the nitrogen fixing pSymA in the root nodule-associated legume symbiont

407 *Sinorhizobium meliloti* could be furthered by evaluating the impact of gene expression on  
408 individual genes<sup>13</sup>.

409 We compared bacterial synthetic biology parts both *in vitro* and *in planta*, revealing that  
410 while constitutive synthetic promoters will likely perform similarly in different environments, the  
411 performance of inducible systems may be highly variable. Further characterization of synthetic  
412 regulatory elements *in situ* will enable more precise engineering. However, by using these tools  
413 to replace the master regulatory VirA/G system with synthetic regulation, we not only gained  
414 precise control of individual gene expression, but also insulated the bacteria from host  
415 mechanisms that interfere with gene expression, which has been previously observed<sup>50,51</sup>. In  
416 fungi, current methods require long *vir* gene induction times in conditions that may not be  
417 optimal for the growth of certain fungi, which could be bypassed using synthetic pTi<sup>49,52</sup>. Thus,  
418 separating AMT induction from its native inducing conditions (*i.e.*, low pH, sugar, and phenolic  
419 compounds) may also provide unique opportunities in improving fungal transformations.

420 By mobilizing the transformation phenotype via pDimples into *R. rhizogenes*, we open  
421 the door to another promising avenue of AMT engineering: transferring the complex *vir*  
422 machinery to other bacteria. As *A. fabrum* can elicit plant immunity that impede transformation,  
423 multiple efforts have been made recently to circumvent this either through mutation of known  
424 immunogenic loci<sup>53</sup> or the addition of immune suppressing systems<sup>54</sup>. This work lays the  
425 foundation to developing synthetic pTi that function in bacteria that elicit minimal immune  
426 responses across plant species, potentially enabling the transformation of those that have  
427 traditionally been recalcitrant to genetic modification.

428 In synthetic biology, our inability to efficiently transform new organisms represents the  
429 biggest bottleneck to dramatically expanding the scope and range of species that can be  
430 utilized. Given the wide diversity of eukaryotes that can be transformed by *Agrobacterium*,  
431 future synthetic pTi may be optimized to target currently untransformable organisms and enable  
432 entirely new areas of biotechnology.

433

## 434 **Materials and Methods**

### 435 Media, chemicals, and culture conditions

436 Routine bacterial cultures were grown in Luria-Bertani (LB) Miller medium (BD  
437 Biosciences, USA). *E. coli* was grown at 37 °C, while *A. fabrum* was grown at 30 °C unless  
438 otherwise noted. Cultures were supplemented with kanamycin (50 mg/L, Sigma Aldrich, USA),  
439 gentamicin (30 mg/L, Fisher Scientific, USA), or spectinomycin (100mg/L, Sigma Aldrich, USA),

440 when indicated. All other compounds unless otherwise specified were purchased through Sigma  
441 Aldrich. Bacterial kinetic growth curves were performed as described previously <sup>40</sup>.

442

#### 443 Strains and plasmids

444 All bacterial strains and plasmids used in this work are listed in **Supplemental Table 1**  
445 **and 2**. All strains and plasmids created in this work are viewable through the public instance of  
446 the JBEI registry. (<https://public-registry.jbei.org/folders/814>). All plasmids generated in this  
447 paper were designed using Device Editor and Vector Editor software, while all primers used for  
448 the construction of plasmids were designed using j5 software <sup>55-57</sup>. Synthetic DNA was  
449 synthesized from Twist Biosciences. Plasmids were assembled via Gibson Assembly using  
450 standard protocols <sup>58</sup>, Golden Gate Assembly using standard protocols <sup>59</sup>, or restriction digest  
451 followed by ligation with T4 ligase as previously described <sup>60</sup>. Plasmids were routinely isolated  
452 using the Qiaprep Spin Miniprep kit (Qiagen, USA), and all primers were purchased from  
453 Integrated DNA Technologies (IDT, Coralville, IA). Plasmid sequences were verified using  
454 whole plasmid sequencing (Primordium Labs, Monrovia, CA). *Agrobacterium* was routinely  
455 transformed via electroporation as described previously <sup>61</sup>.

456

#### 457 Construction of deletion mutants

458 Deletion mutants in *A. fabrum* GV3101 were constructed by homologous recombination  
459 and *sacB* counterselection using the allelic exchange as described previously <sup>62</sup>. Briefly,  
460 homology fragments of 1 kbp up- and downstream of the target gene, including the start and  
461 stop codons respectively, were cloned into pMQ30K - a kanamycin resistance-bearing  
462 derivative of pMQ30 <sup>63</sup>. Plasmids were then transformed via electroporation into *E. coli* S17 and  
463 then mated into *A. fabrum* via conjugation. Transconjugants were selected for on LB Agar plates  
464 supplemented with kanamycin 50 mg/mL, and rifampicin 100 mg/mL. Transconjugants were  
465 then grown overnight on LB media also supplemented with 50 mg/mL kanamycin, and 100  
466 mg/mL rifampicin, and then plated on LB Agar with no NaCl supplemented with 10% w/v  
467 sucrose. Putative deletions were restreaked on LB Agar with no NaCl supplemented with 10%  
468 w/v sucrose, and then were screened via PCR with primers flanking the target gene to confirm  
469 gene deletion.

470

#### 471 Synthetic part characterization

472 Characterization of pGinger vectors harbored by *A. fabrum* *in vitro* was performed as  
473 previously described for other bacteria <sup>40</sup>. Briefly, *A. fabrum* C58C1 with different pGinger

474 vectors were grown overnight in 10mL of LB supplemented with kanamycin overnight at 30°C  
475 with 250 rpm shaking and then diluted 1:100 into 500 µL of fresh LB media with kanamycin in a  
476 deep-well 96-well plate (Corning) For inducible promoters, chemical inducers were added in  
477 two-fold dilutions before incubation. Cells were then grown at 30°C for 24-hours while shaking at  
478 250 rpm, and then 100 µL was measured for absorbance at OD<sub>600</sub> as well as for RFP  
479 fluorescence using an excitation wavelength of 590 nm and an emission wavelength of 635 nm  
480 with a gain setting of 75 on a BioTek Synergy H1 microplate reader (Agilent).

481 To evaluate the performance of synthetic promoters *in planta*, strains were grown in 5mL  
482 LB media with kanamycin at 30°C with 250 rpm shaking overnight, and then diluted 1:5 with  
483 fresh media then grown for an additional 3 hours at 30°C with 250 rpm shaking. Cultures were  
484 then adjusted to an absorbance at OD<sub>600</sub> of 1.0 in agroinfiltration buffer (10mM MgCl<sub>2</sub>, 10mM  
485 MES, 200µM acetosyringone, pH 5.6), and infiltrated into either *N. benthamiana* or *A. thaliana*  
486 leaf tissue. When appropriate chemical inducers were added to the agroinfiltration media  
487 immediately before leaf infiltration. Either one, or three days post-infiltration 6mm leaf disks  
488 were excised from each Agro-infiltrated leaf using a hole puncher and placed atop 300µL of  
489 water in a black, clear-bottom, 96-well microtiter plate (Corning). GFP fluorescence of each leaf  
490 disk was then measured using a BioTek Synergy H1 microplate reader (Agilent) with an  
491 excitation wavelength of 488 nm and measurement wavelength of 520 nm.

#### 492 Plant Growth Conditions

493 *A. thaliana* were germinated and grown in Sunshine Mix #1 soil (Sungro) in a Percival  
494 growth chamber at 22°C and 60% humidity using a 8/16 hour light/dark cycle with a daytime  
495 PPFD of ~200 µmol/m<sup>2</sup>s. *N. benthamiana* plants were grown according to a previously  
496 described standardized lab protocol<sup>41</sup>. All tobacco growth was conducted in an indoor growth  
497 room at 25°C and 60% humidity using a 16/8 hour light/dark cycle with a daytime PPFD of ~120  
498 µmol/m<sup>2</sup>s. Plants were maintained in Sunshine Mix #4 soil (Sungro) supplemented with  
499 Osmocote 14-14-14 fertilizer (ICL) at 5mL/L and agroinfiltrated 29 days after seed sowing.

#### 500 Tobacco Infiltration and Leaf Punch Assay:

501 *A. fabrum* strains were grown in LB liquid media containing necessary antibiotics (50  
502 µg/mL rifampicin, 30 µg/mL gentamicin, 50 µg/mL kanamycin, and 100 µg/mL spectinomycin for  
503 most strains) to an OD<sub>600</sub> between 0.6 and 1.0 before pelleting. Cells were then prepared for  
504 infiltration by resuspension in agroinfiltration buffer (10mM MgCl<sub>2</sub>, 10mM MES, 200µM  
505 acetosyringone, pH 5.6) to a final OD<sub>600</sub> of 1.0 and were allowed to induce for 2 hours in  
506 infiltration buffer at room temperature. When appropriate, chemical inducers (i.e. IPTG) were  
507 added during the 2 hour induction period. Each strain was then infiltrated into the fourth and fifth

508 leaf (counting down from the top) of eight biological replicate tobacco plants. GFP transgene  
509 expression in agroinfiltrated leaves was then assessed by a leaf disk fluorescence assay three  
510 days post-infiltration. Four 6mm leaf disks were excised from each agroinfiltrated leaf using a  
511 hole puncher and placed atop 300 $\mu$ L of water in a black, clear-bottom, 96-well microtiter plate  
512 (Corning). GFP fluorescence of each leaf disk was then measured using a BioTek Synergy H1  
513 microplate reader (Agilent) with an excitation wavelength of 488 nm and measurement  
514 wavelength of 520 nm.

515

#### 516 *Rhodospordium toruloides* Transformation

517 *Agrobacterium tumefaciens* mediated transformation was performed on *Rhodospordium*  
518 *toruloides* IFO0880 with a codon optimized epi-isozizaene synthase from *Streptomyces*  
519 *coelicolor* A3(2) (JPUB\_013523)<sup>64</sup> as previously described<sup>65</sup>. When appropriate 2mM IPTG  
520 was added to agrobacterium induction media. Transformants were confirmed via colony PCR  
521 specific to the integrated T-DNA.

522

#### 523 Proteomic Analysis

524 Proteins from *A. fabrum* samples were extracted using a previously described  
525 chloroform/methanol precipitation method<sup>66</sup>. Extracted proteins were resuspended in the 100  
526 mM ammonium bicarbonate buffer supplemented with 20% methanol, and protein concentration  
527 was determined by the DC assay (BioRad). Protein reduction was accomplished using 5 mM tris  
528 2-(carboxyethyl)phosphine (TCEP) for 30 min at room temperature, and alkylation was  
529 performed with 10 mM iodoacetamide (IAM; final concentration) for 30 min at room temperature  
530 in the dark. Overnight digestion with trypsin was accomplished with a 1:50 trypsin:total protein  
531 ratio. The resulting peptide samples were analyzed on an Agilent 1290 UHPLC system coupled  
532 to a Thermo scientific Orbitrap Exploris 480 mass spectrometer for discovery proteomics<sup>67</sup>.  
533 Briefly, 20  $\mu$ g of tryptic peptides were loaded onto an Ascentis® (Sigma–Aldrich) ES-C18  
534 column (2.1 mm  $\times$  100 mm, 2.7  $\mu$ m particle size, operated at 60°C) and were eluted from the  
535 column by using a 10 minute gradient from 98% buffer A (0.1 % FA in H<sub>2</sub>O) and 2% buffer B  
536 (0.1% FA in acetonitrile) to 65% buffer A and 35% buffer B. The eluting peptides were  
537 introduced to the mass spectrometer operating in positive-ion mode. Full MS survey scans were  
538 acquired in the range of 300-1200 m/z at 60,000 resolution. The automatic gain control (AGC)  
539 target was set at 3e6 and the maximum injection time was set to 60 ms. Top 10 multiply  
540 charged precursor ions (2-5) were isolated for higher-energy collisional dissociation (HCD)  
541 MS/MS using a 1.6 m/z isolation window and were accumulated until they either reached an



542 AGC target value of 1e5 or a maximum injection time of 50 ms. MS/MS data were generated  
543 with a normalized collision energy (NCE) of 30, at a resolution of 15,000. Upon fragmentation  
544 precursor ions were dynamically excluded for 10 s after the first fragmentation event. The  
545 acquired LCMS raw data were converted to mgf files and searched against the latest uniprot *A.*  
546 *tumefaciens* protein database with Mascot search engine version 2.3.02 (Matrix Science). The  
547 resulting search results were filtered and analyzed by Scaffold v 5.0 (Proteome Software Inc.).  
548 The normalized spectra count of identified proteins were exported for relative quantitative  
549 analysis.

550

### 551 Bioinformatic Analyses

552 Sequences of individual *vir* genes from genomes of all sequenced *Agrobacterium* were  
553 identified and extracted as previously described<sup>68</sup>. MACSE v. 2.07 with the parameter “-prog  
554 alignSequences” was used to generate codon alignments for each *vir* gene dataset<sup>69</sup>. The  
555 HYPHY v2.2 program “cln” was used to remove identical sequences and stop codons from each  
556 alignment<sup>70</sup>. IQ-TREE v. 1.6.12 with the default parameters was used to generate a phylogeny  
557 for each dataset<sup>71</sup>. The HYPHY program FUBAR with the codon alignment, phylogeny, and a  
558 probability threshold of 0.9 was used to calculate per-site  $d_N/d_S$  and detect signals of positive or  
559 purifying selection.

560

### 561 Statistical analyses and data presentation

562 All numerical data were analyzed using custom Python scripts. All graphs were  
563 visualized using either Seaborn or Matplotlib<sup>72,73</sup>. Calculation of 95% confidence intervals,  
564 standard deviations, and T-test statistics were conducted via the Scipy library<sup>74</sup>. Bonferroni  
565 corrections were calculated using the MNE python library<sup>75</sup>.

566 Alleles of homologous *vir* genes were aligned using MAFFT v. 7.508<sup>76</sup> and converted  
567 into phylogenetic trees using FastTree v. 2.1.11<sup>77</sup>. Phylogenetic distance was calculated using  
568 dendropy v. 4.6.1<sup>78</sup>.

569

### 570 **Acknowledgements**

571 We would like to thank Catharine Adams, Adam Arkin, and William Moore for helpful  
572 discussions during the preparation of this manuscript. We would like to thank Sasilada  
573 Sirirunguang and Simon Alamos for help with plant growth and microscopy. We would also like  
574 to thank Rachel Li, Nick Harris, Charles Denby, and Jutta Dalton for their support during the  
575 Covid-19 pandemic. *A. fabrum* C58C1 was received from John Zupan at UC Berkeley. MGT<sub>is</sub> a

576 Simons Foundation Awardee of the Life Sciences Research Foundation. LMW is funded  
577 through the National Science Foundation Graduate Research Fellowship. AJW was funded in  
578 part by startup funding from the Department of Botany and Plant Pathology at Oregon State  
579 University. JHC is supported in part by the National Institute of Food and Agriculture, US  
580 Department of Agriculture (2022-67013-36883). Synthesis of *vir* gene alleles was supported by  
581 the JGI BRC proposal WIP# 507140: Synthetic minimal redesign of plant transformation  
582 plasmids. This work was part of the DOE Joint BioEnergy Institute (<https://www.jbei.org>)  
583 supported by the U. S. Department of Energy, Office of Science, Office of Biological and  
584 Environmental Research, supported by the U.S. Department of Energy, Energy Efficiency and  
585 Renewable Energy, Bioenergy Technologies Office, through contract DE-AC02-05CH11231  
586 between Lawrence Berkeley National Laboratory and the U.S. Department of Energy. The  
587 funders had no role in manuscript preparation or the decision to publish. The views and opinions  
588 of the authors expressed herein do not necessarily state or reflect those of the United States  
589 Government or any agency thereof. Neither the United States Government nor any agency  
590 thereof, nor any of their employees, makes any warranty, expressed or implied, or assumes any  
591 legal liability or responsibility for the accuracy, completeness, or usefulness of any information,  
592 apparatus, product, or process disclosed, or represents that its use would not infringe privately  
593 owned rights. The United States Government retains and the publisher, by accepting the article  
594 for publication, acknowledges that the United States Government retains a nonexclusive, paid-  
595 up, irrevocable, worldwide license to publish or reproduce the published form of this manuscript,  
596 or allow others to do so, for United States Government purposes. The Department of Energy will  
597 provide public access to these results of federally sponsored research in accordance with the  
598 DOE Public Access Plan (<http://energy.gov/downloads/doe-public-access-plan>).  
599

## 600 **Contributions**

601 Conceptualization, M.G.T., P.M.S.; Methodology, M.G.T., L.D.K, A.N.P., L.W., A.W., G.M.G.;  
602 Investigation, M.G.T., L.D.K., G.M.G., L.M. W., A.N.P., M.S., K.V., S.S., K.M., S.A, N.F.C.H,  
603 D.S., C.T., R.C., S.L., J.C., H.P., J.W.G, Y.C., A.J.W.; Writing – Original Draft, M.G.T.; Writing –  
604 Review and Editing, All authors.; Resources and supervision, D.L., C.J.P. ,J.M.G., H.V.S A.W.,  
605 J.H.C., J.D.K., P.M.S.

## 606 **Competing Interests**

607

608 A patent on the minimized refactoring of AMT has been filed by Lawrence Berkeley National  
609 Laboratory with M.G.T., A.N.P., and P.M.S. as inventors. J.D.K. has financial interests in  
610 Amyris, Ansa Biotechnologies, Apertor Pharma, Berkeley Yeast, Demetrix, Lygos, Napigen,  
611 ResVita Bio, and Zero Acre Farms.

612

## 613 **References**

- 614 1. Scholthof, K.-B.G. (2007). The disease triangle: pathogens, the environment and society.  
615 *Nat. Rev. Microbiol.* 5, 152–156. [10.1038/nrmicro1596](https://doi.org/10.1038/nrmicro1596).
- 616 2. Laabei, M., and Massey, R. (2016). Using functional genomics to decipher the complexity  
617 of microbial pathogenicity. *Curr. Genet.* 62, 523–525. [10.1007/s00294-016-0576-4](https://doi.org/10.1007/s00294-016-0576-4).
- 618 3. Merhej, V., Georgiades, K., and Raoult, D. (2013). Postgenomic analysis of bacterial  
619 pathogens repertoire reveals genome reduction rather than virulence factors. *Brief. Funct.*  
620 *Genomics* 12, 291–304. [10.1093/bfpg/elt015](https://doi.org/10.1093/bfpg/elt015).
- 621 4. Pfeilmeier, S., Caly, D.L., and Malone, J.G. (2016). Bacterial pathogenesis of plants: future  
622 challenges from a microbial perspective: Challenges in Bacterial Molecular Plant Pathology.  
623 *Mol. Plant Pathol.* 17, 1298–1313. [10.1111/mpp.12427](https://doi.org/10.1111/mpp.12427).
- 624 5. Deutscher, D., Meilijson, I., Schuster, S., and Ruppin, E. (2008). Can single knockouts  
625 accurately single out gene functions? *BMC Syst. Biol.* 2, 50. [10.1186/1752-0509-2-50](https://doi.org/10.1186/1752-0509-2-50).
- 626 6. Calgaro-Kozina, A., Vuu, K.M., Keasling, J.D., Loqué, D., Sattely, E.S., and Shih, P.M.  
627 (2020). Engineering plant synthetic pathways for the biosynthesis of novel antifungals. *ACS*  
628 *Cent. Sci.* 6, 1394–1400. [10.1021/acscentsci.0c00241](https://doi.org/10.1021/acscentsci.0c00241).
- 629 7. Ro, D.-K., Paradise, E.M., Ouellet, M., Fisher, K.J., Newman, K.L., Ndungu, J.M., Ho, K.A.,  
630 Eachus, R.A., Ham, T.S., Kirby, J., et al. (2006). Production of the antimalarial drug  
631 precursor artemisinic acid in engineered yeast. *Nature* 440, 940–943.  
632 [10.1038/nature04640](https://doi.org/10.1038/nature04640).
- 633 8. Budin, I., and Keasling, J.D. (2019). Synthetic biology for fundamental biochemical  
634 discovery. *Biochemistry* 58, 1464–1469. [10.1021/acs.biochem.8b00915](https://doi.org/10.1021/acs.biochem.8b00915).
- 635 9. Temme, K., Zhao, D., and Voigt, C.A. (2012). Refactoring the nitrogen fixation gene cluster  
636 from *Klebsiella oxytoca*. *Proc Natl Acad Sci USA* 109, 7085–7090.  
637 [10.1073/pnas.1120788109](https://doi.org/10.1073/pnas.1120788109).
- 638 10. Kim, N.M., Sinnott, R.W., and Sandoval, N.R. (2020). Transcription factor-based biosensors  
639 and inducible systems in non-model bacteria: current progress and future directions. *Curr.*  
640 *Opin. Biotechnol.* 64, 39–46. [10.1016/j.copbio.2019.09.009](https://doi.org/10.1016/j.copbio.2019.09.009).
- 641 11. Song, M., Sukovich, D.J., Ciccarelli, L., Mayr, J., Fernandez-Rodriguez, J., Mirsky, E.A.,  
642 Tucker, A.C., Gordon, D.B., Marlovits, T.C., and Voigt, C.A. (2017). Control of type III  
643 protein secretion using a minimal genetic system. *Nat. Commun.* 8, 14737.  
644 [10.1038/ncomms14737](https://doi.org/10.1038/ncomms14737).

- 645 12. Sorg, R.A., Gallay, C., Van Maele, L., Sirard, J.-C., and Veening, J.-W. (2020). Synthetic  
646 gene-regulatory networks in the opportunistic human pathogen *Streptococcus pneumoniae*.  
647 *Proc Natl Acad Sci USA* *117*, 27608–27619. 10.1073/pnas.1920015117.
- 648 13. Geddes, B.A., Kearsley, J.V.S., Huang, J., Zamani, M., Muhammed, Z., Sather, L.,  
649 Panchal, A.K., diCenzo, G.C., and Finan, T.M. (2021). Minimal gene set from  
650 *Sinorhizobium* (Ensifer) meliloti pSymA required for efficient symbiosis with *Medicago*. *Proc*  
651 *Natl Acad Sci USA* *118*. 10.1073/pnas.2018015118.
- 652 14. Nester, E.W. (2014). *Agrobacterium*: nature’s genetic engineer. *Front. Plant Sci.* *5*, 730.  
653 10.3389/fpls.2014.00730.
- 654 15. Dessaux, Y., Petit, A., Farrand, S.K., and Murphy, P.J. (1998). Opines and Opine-Like  
655 Molecules Involved in Plant-Rhizobiaceae Interactions. In *The Rhizobiaceae*, H. P. Spaink,  
656 A. Kondorosi, and P. J. J. Hooykaas, eds. (Springer Netherlands), pp. 173–197.  
657 10.1007/978-94-011-5060-6\_9.
- 658 16. Lee, L.-Y., and Gelvin, S.B. (2008). T-DNA binary vectors and systems. *Plant Physiol.* *146*,  
659 325–332. 10.1104/pp.107.113001.
- 660 17. Bundock, P., den Dulk-Ras, A., Beijersbergen, A., and Hooykaas, P.J. (1995). Trans-  
661 kingdom T-DNA transfer from *Agrobacterium tumefaciens* to *Saccharomyces cerevisiae*.  
662 *EMBO J.* *14*, 3206–3214. 10.1002/j.1460-2075.1995.tb07323.x.
- 663 18. de Groot, M.J., Bundock, P., Hooykaas, P.J., and Beijersbergen, A.G. (1998).  
664 *Agrobacterium tumefaciens*-mediated transformation of filamentous fungi. *Nat. Biotechnol.*  
665 *16*, 839–842. 10.1038/nbt0998-839.
- 666 19. Thompson, M.G., Moore, W.M., Hummel, N.F.C., Pearson, A.N., Barnum, C.R., Scheller,  
667 H.V., and Shih, P.M. (2020). *Agrobacterium tumefaciens*: A Bacterium Primed for Synthetic  
668 Biology. *BioDesign Research* *2020*, 1–16. 10.34133/2020/8189219.
- 669 20. De Saeger, J., Park, J., Chung, H.S., Hernalsteens, J.-P., Van Lijsebettens, M., Inzé, D.,  
670 Van Montagu, M., and Depuydt, S. (2021). *Agrobacterium* strains and strain improvement:  
671 Present and outlook. *Biotechnol. Adv.* *53*, 107677. 10.1016/j.biotechadv.2020.107677.
- 672 21. Thomashow, M.F., Panagopoulos, C.G., Gordon, M.P., and Nester, E.W. (1980). Host  
673 range of *Agrobacterium tumefaciens* is determined by the Ti plasmid. *Nature* *283*, 794–796.  
674 10.1038/283794a0.
- 675 22. Hood, E.E., Fraley, R.T., and Chilton, M.D. (1987). Virulence of *Agrobacterium tumefaciens*  
676 Strain A281 on Legumes. *Plant Physiol.* *83*, 529–534. 10.1104/pp.83.3.529.
- 677 23. Ooms, G., Hooykaas, P.J., Moolenaar, G., and Schilperoort, R.A. (1981). Grown gall plant  
678 tumors of abnormal morphology, induced by *Agrobacterium tumefaciens* carrying mutated  
679 octopine Ti plasmids; analysis of T-DNA functions. *Gene* *14*, 33–50. 10.1016/0378-  
680 1119(81)90146-3.
- 681 24. Anand, A., Bass, S.H., Wu, E., Wang, N., McBride, K.E., Annaluru, N., Miller, M., Hua, M.,  
682 and Jones, T.J. (2018). An improved ternary vector system for *Agrobacterium*-mediated  
683 rapid maize transformation. *Plant Mol. Biol.* *97*, 187–200. 10.1007/s11103-018-0732-y.

- 684 25. Anand, A., Che, P., Wu, E., and Jones, T.J. (2019). Novel ternary vectors for efficient  
685 sorghum transformation. *Methods Mol. Biol.* 1931, 185–196. 10.1007/978-1-4939-9039-  
686 9\_13.
- 687 26. Komari, T., Takakura, Y., Ueki, J., Kato, N., Ishida, Y., and Hiei, Y. (2006). Binary vectors  
688 and super-binary vectors. *Methods Mol. Biol.* 343, 15–41. 10.1385/1-59745-130-4:15.
- 689 27. Doty, S.L., Yu, M.C., Lundin, J.I., Heath, J.D., and Nester, E.W. (1996). Mutational analysis  
690 of the input domain of the VirA protein of *Agrobacterium tumefaciens*. *J. Bacteriol.* 178,  
691 961–970. 10.1128/jb.178.4.961-970.1996.
- 692 28. Heath, J.D., Boulton, M.I., Raineri, D.M., Doty, S.L., Mushegian, A.R., Charles, T.C.,  
693 Davies, J.W., and Nester, E.W. (1997). Discrete regions of the sensor protein virA  
694 determine the strain-specific ability of *Agrobacterium* to agroinfect maize. *Mol. Plant*  
695 *Microbe Interact.* 10, 221–227. 10.1094/MPMI.1997.10.2.221.
- 696 29. Jarchow, E., Grimsley, N.H., and Hohn, B. (1991). virF, the host-range-determining  
697 virulence gene of *Agrobacterium tumefaciens*, affects T-DNA transfer to *Zea mays*. *Proc*  
698 *Natl Acad Sci USA* 88, 10426–10430. 10.1073/pnas.88.23.10426.
- 699 30. Hansen, G., Das, A., and Chilton, M.D. (1994). Constitutive expression of the virulence  
700 genes improves the efficiency of plant transformation by *Agrobacterium*. *Proc Natl Acad Sci*  
701 *USA* 91, 7603–7607. 10.1073/pnas.91.16.7603.
- 702 31. Turk, S.C., Nester, E.W., and Hooykaas, P.J. (1993). The virA promoter is a host-range  
703 determinant in *Agrobacterium tumefaciens*. *Mol. Microbiol.* 7, 719–724. 10.1111/j.1365-  
704 2958.1993.tb01162.x.
- 705 32. Raineri, D.M., Boulton, M.I., Davies, J.W., and Nester, E.W. (1993). VirA, the plant-signal  
706 receptor, is responsible for the Ti plasmid-specific transfer of DNA to maize by  
707 *Agrobacterium*. *Proc Natl Acad Sci USA* 90, 3549–3553. 10.1073/pnas.90.8.3549.
- 708 33. Krishnamohan, A., Balaji, V., and Veluthambi, K. (2001). Efficient vir gene induction in  
709 *Agrobacterium tumefaciens* requires virA, virG, and vir box from the same Ti plasmid. *J.*  
710 *Bacteriol.* 183, 4079–4089. 10.1128/JB.183.13.4079-4089.2001.
- 711 34. Lin, Y.-H., Gao, R., Binns, A.N., and Lynn, D.G. (2008). Capturing the VirA/VirG TCS of  
712 *Agrobacterium tumefaciens*. *Adv. Exp. Med. Biol.* 631, 161–177. 10.1007/978-0-387-  
713 78885-2\_11.
- 714 35. Wehrs, M., Tanjore, D., Eng, T., Lievens, J., Pray, T.R., and Mukhopadhyay, A. (2019).  
715 Engineering Robust Production Microbes for Large-Scale Cultivation. *Trends Microbiol.* 27,  
716 524–537. 10.1016/j.tim.2019.01.006.
- 717 36. Cubillos-Ruiz, A., Guo, T., Sokolovska, A., Miller, P.F., Collins, J.J., Lu, T.K., and Lora, J.M.  
718 (2021). Engineering living therapeutics with synthetic biology. *Nat. Rev. Drug Discov.* 20,  
719 941–960. 10.1038/s41573-021-00285-3.
- 720 37. Schuster, L.A., and Reisch, C.R. (2021). A plasmid toolbox for controlled gene expression  
721 across the Proteobacteria. *Nucleic Acids Res.* 49, 7189–7202. 10.1093/nar/gkab496.
- 722 38. Qian, Y., Kong, W., and Lu, T. (2021). Precise and reliable control of gene expression in

- 723 *Agrobacterium tumefaciens*. *Biotechnol. Bioeng.* *118*, 3962–3972. 10.1002/bit.27872.
- 724 39. Denkovskienė, E., Paškevičius, Š., Werner, S., Gleba, Y., and Ražanskienė, A. (2015).  
725 Inducible Expression of *Agrobacterium* Virulence Gene *VirE2* for Stringent Regulation of T-  
726 DNA Transfer in Plant Transient Expression Systems. *Mol. Plant Microbe Interact.* *28*,  
727 1247–1255. 10.1094/MPMI-05-15-0102-R.
- 728 40. Pearson, A.N., Thompson, M.G., Kirkpatrick, L.D., Ho, C., Vuu, K.M., Waldburger, L.M.,  
729 Keasling, J.D., and Shih, P.M. (2023). The pGinger Family of Expression Plasmids.  
730 *Microbiol. Spectr.* *11*, e0037323. 10.1128/spectrum.00373-23.
- 731 41. Zhou, A., Kirkpatrick, L.D., Ornelas, I.J., Washington, L.J., Hummel, N.F.C., Gee, C.W.,  
732 Tang, S.N., Barnum, C.R., Scheller, H.V., and Shih, P.M. (2023). A suite of constitutive  
733 promoters for tuning gene expression in plants. *ACS Synth. Biol.* *12*, 1533–1545.  
734 10.1021/acssynbio.3c00075.
- 735 42. Zipfel, C., Kunze, G., Chinchilla, D., Caniard, A., Jones, J.D.G., Boller, T., and Felix, G.  
736 (2006). Perception of the bacterial PAMP EF-Tu by the receptor EFR restricts  
737 *Agrobacterium*-mediated transformation. *Cell* *125*, 749–760. 10.1016/j.cell.2006.03.037.
- 738 43. Zhang, X., Hooykaas, M.J.G., van Heusden, G.P., and Hooykaas, P.J.J. (2022). The  
739 translocated virulence protein *VirD5* causes DNA damage and mutation during  
740 *Agrobacterium*-mediated transformation of yeast. *Sci. Adv.* *8*, eadd3912.  
741 10.1126/sciadv.add3912.
- 742 44. Zhang, X., van Heusden, G.P.H., and Hooykaas, P.J.J. (2017). Virulence protein *VirD5* of  
743 *Agrobacterium tumefaciens* binds to kinetochores in host cells via an interaction with *Spt4*.  
744 *Proc Natl Acad Sci USA* *114*, 10238–10243. 10.1073/pnas.1706166114.
- 745 45. Wang, K., Herrera-Estrella, A., and Van Montagu, M. (1990). Overexpression of *virD1* and  
746 *virD2* genes in *Agrobacterium tumefaciens* enhances T-complex formation and plant  
747 transformation. *J. Bacteriol.* *172*, 4432–4440. 10.1128/jb.172.8.4432-4440.1990.
- 748 46. Weisberg, A.J., Davis, E.W., Tabima, J., Belcher, M.S., Miller, M., Kuo, C.-H., Loper, J.E.,  
749 Grünwald, N.J., Putnam, M.L., and Chang, J.H. (2020). Unexpected conservation and  
750 global transmission of agrobacterial virulence plasmids. *Science* *368*.  
751 10.1126/science.aba5256.
- 752 47. Weisberg, A.J., Wu, Y., Chang, J.H., Lai, E.M., and Kuo, C.H. (2023). Virulence and  
753 Ecology of *Agrobacteria* in the Context of Evolutionary Genomics. *Annu. Rev. Phytopathol.*  
754 *61*.
- 755 48. Idnurm, A., Bailey, A.M., Cairns, T.C., Elliott, C.E., Foster, G.D., Ianiri, G., and Jeon, J.  
756 (2017). A silver bullet in a golden age of functional genomics: the impact of *Agrobacterium*-  
757 mediated transformation of fungi. *Fungal Biol. Biotechnol.* *4*, 6. 10.1186/s40694-017-0035-  
758 0.
- 759 49. Hooykaas, P.J.J., van Heusden, G.P.H., Niu, X., Reza Roushan, M., Soltani, J., Zhang, X.,  
760 and van der Zaal, B.J. (2018). *Agrobacterium*-Mediated Transformation of Yeast and Fungi.  
761 *Curr. Top. Microbiol. Immunol.* *418*, 349–374. 10.1007/82\_2018\_90.
- 762 50. Lang, J., Gonzalez-Mula, A., Taconnat, L., Clement, G., and Faure, D. (2016). The plant

- 763 GABA signaling downregulates horizontal transfer of the *Agrobacterium tumefaciens*  
764 virulence plasmid. *New Phytol.* *210*, 974–983. 10.1111/nph.13813.
- 765 51. Liu, P., and Nester, E.W. (2006). Indoleacetic acid, a product of transferred DNA, inhibits vir  
766 gene expression and growth of *Agrobacterium tumefaciens* C58. *Proc Natl Acad Sci USA*  
767 *103*, 4658–4662. 10.1073/pnas.0600366103.
- 768 52. Michielse, C.B., Hooykaas, P.J.J., van den Hondel, C.A.M.J.J., and Ram, A.F.J. (2005).  
769 *Agrobacterium*-mediated transformation as a tool for functional genomics in fungi. *Curr.*  
770 *Genet.* *48*, 1–17. 10.1007/s00294-005-0578-0.
- 771 53. Yang, F., Li, G., Felix, G., Albert, M., and Guo, M. (2023). Engineered *Agrobacterium*  
772 improves transformation by mitigating plant immunity detection. *New Phytol.* *237*, 2493–  
773 2504. 10.1111/nph.18694.
- 774 54. Raman, V., Rojas, C.M., Vasudevan, B., Dunning, K., Kolape, J., Oh, S., Yun, J., Yang, L.,  
775 Li, G., Pant, B.D., et al. (2022). *Agrobacterium* expressing a type III secretion system  
776 delivers *Pseudomonas* effectors into plant cells to enhance transformation. *Nat. Commun.*  
777 *13*, 2581. 10.1038/s41467-022-30180-3.
- 778 55. Ham, T.S., Dmytriv, Z., Plahar, H., Chen, J., Hillson, N.J., and Keasling, J.D. (2012).  
779 Design, implementation and practice of JBEI-ICE: an open source biological part registry  
780 platform and tools. *Nucleic Acids Res.* *40*, e141. 10.1093/nar/gks531.
- 781 56. Chen, J., Densmore, D., Ham, T.S., Keasling, J.D., and Hillson, N.J. (2012). DeviceEditor  
782 visual biological CAD canvas. *J. Biol. Eng.* *6*, 1. 10.1186/1754-1611-6-1.
- 783 57. Hillson, N.J., Rosengarten, R.D., and Keasling, J.D. (2012). j5 DNA assembly design  
784 automation software. *ACS Synth. Biol.* *1*, 14–21. 10.1021/sb2000116.
- 785 58. Gibson, D.G., Young, L., Chuang, R.-Y., Venter, J.C., Hutchison, C.A., and Smith, H.O.  
786 (2009). Enzymatic assembly of DNA molecules up to several hundred kilobases. *Nat.*  
787 *Methods* *6*, 343–345. 10.1038/nmeth.1318.
- 788 59. Engler, C., Kandzia, R., and Marillonnet, S. (2008). A one pot, one step, precision cloning  
789 method with high throughput capability. *PLoS ONE* *3*, e3647.  
790 10.1371/journal.pone.0003647.
- 791 60. Green, M.R., and Sambrook, J. (2012). *Molecular Cloning: A Laboratory Manual* (Fourth  
792 Edition), Volume 1, 2 & 3 4th ed. (Cold Spring Harbor Laboratory Press).
- 793 61. Kámán-Tóth, E., Pogány, M., Dankó, T., Szatmári, Á., and Bozsó, Z. (2018). A simplified  
794 and efficient *Agrobacterium tumefaciens* electroporation method. *3 Biotech* *8*, 148.  
795 10.1007/s13205-018-1171-9.
- 796 62. Thompson, M.G., Blake-Hedges, J.M., Cruz-Morales, P., Barajas, J.F., Curran, S.C., Eiben,  
797 C.B., Harris, N.C., Benites, V.T., Gin, J.W., Sharpless, W.A., et al. (2019). Massively  
798 Parallel Fitness Profiling Reveals Multiple Novel Enzymes in *Pseudomonas putida* Lysine  
799 Metabolism. *MBio* *10*. 10.1128/mBio.02577-18.
- 800 63. Shanks, R.M.Q., Kadouri, D.E., MacEachran, D.P., and O'Toole, G.A. (2009). New yeast  
801 recombineering tools for bacteria. *Plasmid* *62*, 88–97. 10.1016/j.plasmid.2009.05.002.

- 802 64. Geiselman, G.M., Kirby, J., Landera, A., Otoupal, P., Papa, G., Barcelos, C., Sundstrom,  
803 E.R., Das, L., Magurudeniya, H.D., Wehrs, M., et al. (2020). Conversion of poplar biomass  
804 into high-energy density tricyclic sesquiterpene jet fuel blendstocks. *Microb. Cell Fact.* *19*,  
805 208. [10.1186/s12934-020-01456-4](https://doi.org/10.1186/s12934-020-01456-4).
- 806 65. Zhang, S., Skerker, J.M., Rutter, C.D., Maurer, M.J., Arkin, A.P., and Rao, C.V. (2016).  
807 Engineering *Rhodospiridium toruloides* for increased lipid production. *Biotechnol. Bioeng.*  
808 *113*, 1056–1066. [10.1002/bit.25864](https://doi.org/10.1002/bit.25864).
- 809 66. Gin, J., Chen, Y., and J Petzold, C. (2020). Chloroform-Methanol Protein Extraction for  
810 Gram-negative Bacteria (High Throughput) v1. [10.17504/protocols.io.bfx6jpre](https://doi.org/10.17504/protocols.io.bfx6jpre).
- 811 67. Chen, Y., Gin, J., and J Petzold, C. (2021). Discovery proteomic (DDA) LC-MS/MS data  
812 acquisition and analysis v2. [10.17504/protocols.io.buthnwj6](https://doi.org/10.17504/protocols.io.buthnwj6).
- 813 68. Weisberg, A.J., Wu, Y., Chang, J.H., Lai, E.-M., and Kuo, C.-H. (2023). Virulence and  
814 ecology of agrobacteria in the context of evolutionary genomics. *Annu. Rev. Phytopathol.*  
815 *61*, 1–23. [10.1146/annurev-phyto-021622-125009](https://doi.org/10.1146/annurev-phyto-021622-125009).
- 816 69. Ranwez, V., Douzery, E.J.P., Cambon, C., Chantret, N., and Delsuc, F. (2018). MACSE v2:  
817 toolkit for the alignment of coding sequences accounting for frameshifts and stop codons.  
818 *Mol. Biol. Evol.* *35*, 2582–2584. [10.1093/molbev/msy159](https://doi.org/10.1093/molbev/msy159).
- 819 70. Pond, S.L.K., Frost, S.D.W., and Muse, S.V. (2005). HyPhy: hypothesis testing using  
820 phylogenies. *Bioinformatics* *21*, 676–679. [10.1093/bioinformatics/bti079](https://doi.org/10.1093/bioinformatics/bti079).
- 821 71. Nguyen, L.-T., Schmidt, H.A., von Haeseler, A., and Minh, B.Q. (2015). IQ-TREE: a fast  
822 and effective stochastic algorithm for estimating maximum-likelihood phylogenies. *Mol. Biol.*  
823 *Evol.* *32*, 268–274. [10.1093/molbev/msu300](https://doi.org/10.1093/molbev/msu300).
- 824 72. mwaskom/seaborn: v0.9.0 (July 2018) | Zenodo <https://doi.org/10.5281/zenodo.1313201>.
- 825 73. Matplotlib: A 2D Graphics Environment - IEEE Journals & Magazine  
826 <https://doi.org/10.1109/MCSE.2007.55>.
- 827 74. Jones, E., Oliphant, T., Peterson, P., and Others SciPy: Open source scientific tools for  
828 Python.
- 829 75. Gramfort, A., Luessi, M., Larson, E., Engemann, D.A., Strohmeier, D., Brodbeck, C.,  
830 Parkkonen, L., and Hämäläinen, M.S. (2014). MNE software for processing MEG and EEG  
831 data. *Neuroimage* *86*, 446–460. [10.1016/j.neuroimage.2013.10.027](https://doi.org/10.1016/j.neuroimage.2013.10.027).
- 832 76. Katoh, K., and Standley, D.M. (2013). MAFFT multiple sequence alignment software  
833 version 7: improvements in performance and usability. *Mol. Biol. Evol.* *30*, 772–780.  
834 [10.1093/molbev/mst010](https://doi.org/10.1093/molbev/mst010).
- 835 77. Price, M.N., Dehal, P.S., and Arkin, A.P. (2010). FastTree 2 — approximately maximum-  
836 likelihood trees for large alignments. *PLoS ONE* *5*, e9490. [10.1371/journal.pone.0009490](https://doi.org/10.1371/journal.pone.0009490).
- 837 78. Sukumaran, J., and Holder, M.T. (2010). DendroPy: a Python library for phylogenetic  
838 computing. *Bioinformatics* *26*, 1569–1571. [10.1093/bioinformatics/btq228](https://doi.org/10.1093/bioinformatics/btq228).

839



840 **Figures**  
841

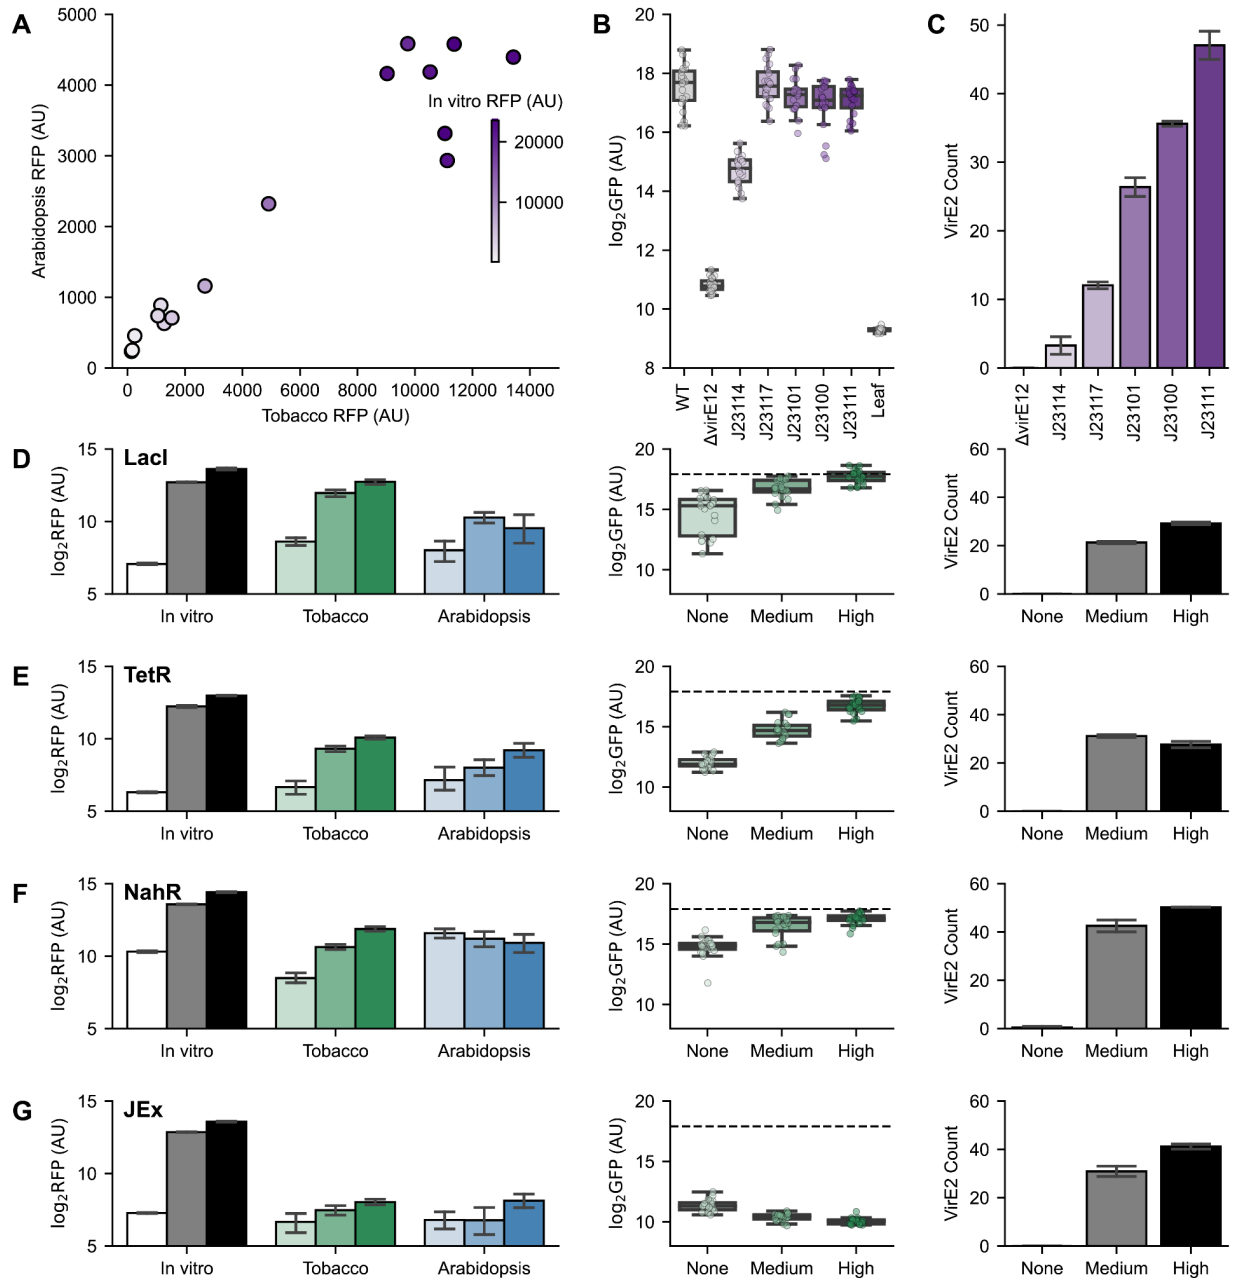

842

843 **Figure 1: Characterizing a Synthetic Biology Toolkit *in planta*:** A) Activity of constitutive  
844 promoters driving RFP from pGingerBK plasmid backbone. The x- and y-axes show RFP  
845 production from *A. fabrum* C58C1 3 days after infiltration in tobacco or *Arabidopsis* respectively  
846 ( $n=12$ ). The color palette displays the activity of the same promoter *in vitro* ( $n=8$ ). B) Transient  
847 expression of GFP from agroinfiltrated tobacco leaves (AU)  $\log_2$  transformed is shown on the y-  
848 axis. Different constitutive promoters used to complement a *virE12* deletion mutant are shown

849 as box and whisker plots with individual data points overlaid (n=64). Transformation by wild-type  
850 GV3101 and tobacco leaf without infiltration controls are shown. C) Proteomic spectral counts of  
851 VirE12 are shown when *virE12* is expressed from different constitutive synthetic promoters *in*  
852 *vitro* (n=3) Rows D-G show characterization of P<sub>LacO</sub>, P<sub>TetR</sub>, P<sub>NahR</sub>, P<sub>JungleExpress</sub> respectively. From  
853 left to right Activity of inducible promoters driving RFP from pGingerBK plasmid backbone in  
854 tobacco (n=12), *Arabidopsis* (n=12), and *in vitro* (n=8). Inducer either not added (“None”), added  
855 at the half maximal induction concentration determined *in vitro* (“Mid”), or at the maximal  
856 induction concentration (“High”). The middle panel show the complementation of a *virE12*  
857 deletion by different inducible promoters as measured by transient GFP expression shown on  
858 the y-axis after log2 transformation(n=64). Inducer either not added (“None”), added at the half  
859 maximal induction concentration determined *in vitro* (“Mid”), or at the maximal induction  
860 concentration (“High”). The right panel shows proteomic spectral counts of VirE12 when  
861 expressed from different inducible promoters (n=3). Inducer either not added (“None”), added at  
862 the half maximal induction concentration determined *in vitro* (“Mid”), or at the maximal induction  
863 concentration (“High”).

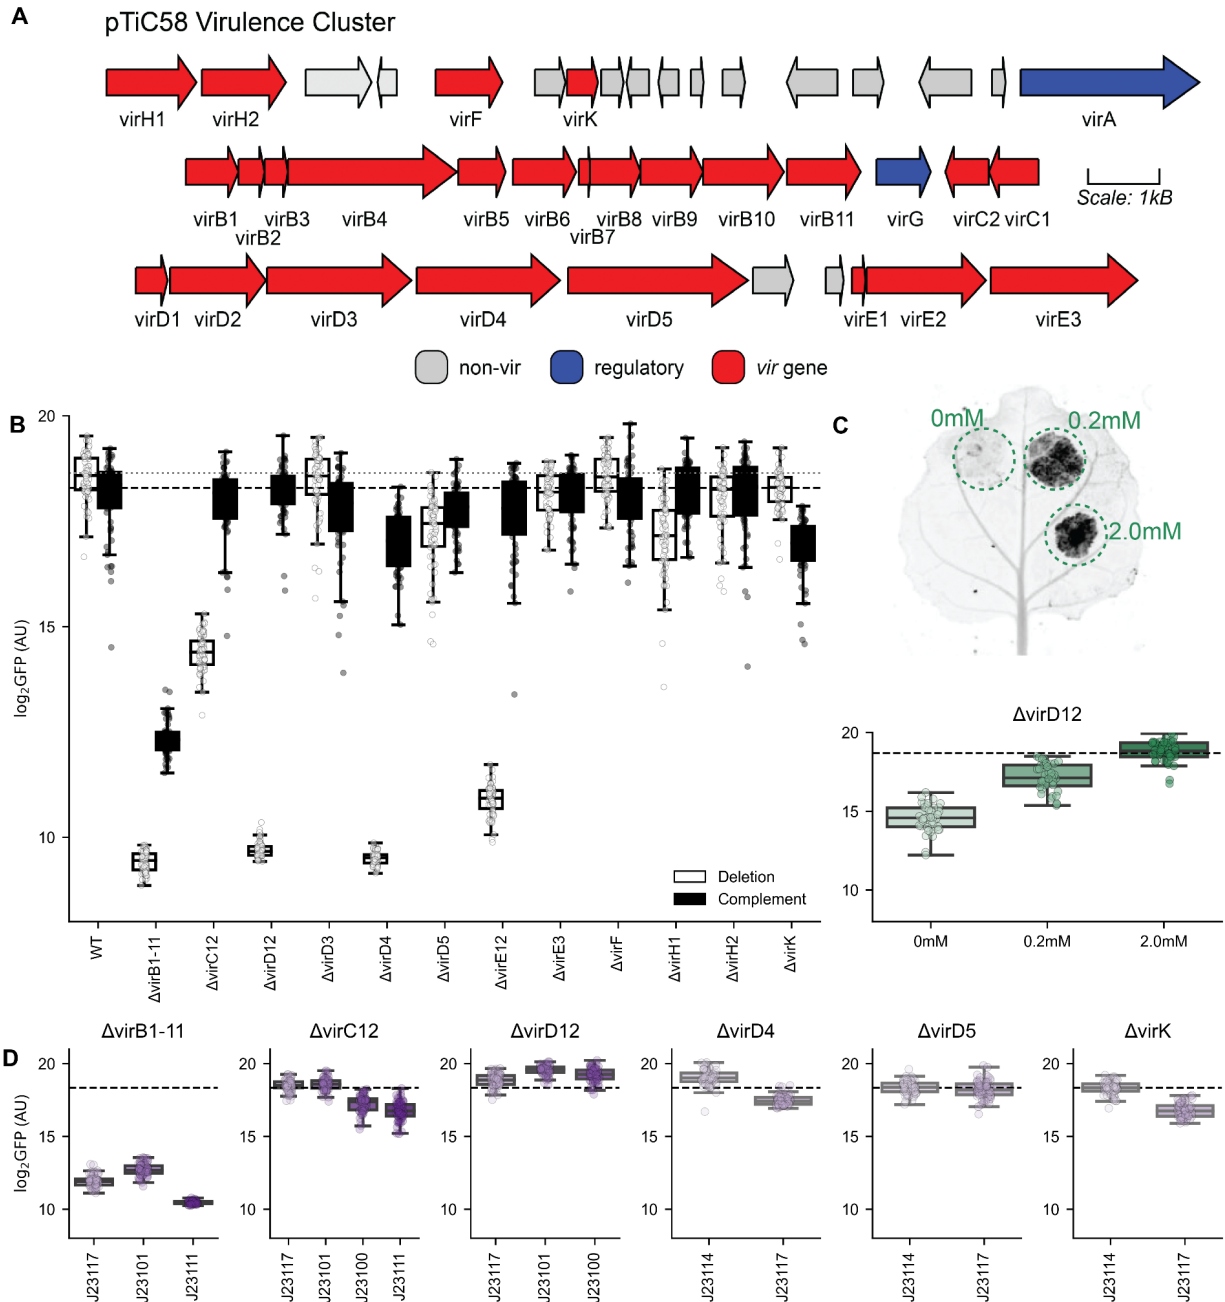

864

865

866

867

868

869

870

871

872

**Figure 2: Quantitative assessment of *vir* gene impact on transformation:** A) The *virulence* gene cluster from pTiC58. Known non-regulatory *vir* genes are shown in red, while regulatory *vir* genes are shown in blue. All other genes are grey. B) Effect of individual *vir* gene cluster deletion on tobacco transformation is measured by transient expression of GFP shown in log<sub>2</sub> transformed AU in white, and complementation of the phenotype driven by P<sub>J23117</sub> is shown in black (n=64). Dashed gray line shows transformation by wild-type GV3101, while dashed black line shows transformation by GV3101 expressing RFP from P<sub>J23117</sub> as a control. C) Picture of a tobacco leaf expressing GFP delivered by a *virD12*

873 deletion mutant complemented from an IPTG inducible promoter with varying levels of  
874 induction indicated. Below shows transient GFP expressed in tobacco when transformed  
875 by *virD12* deletion with different IPTG levels shown in log2 transformed AU is shown on the  
876 y-axis, with the concentration of IPTG used to induce the promoter on the x-axis (n=64).  
877 Dashed line shows wild-type level transformation D) Complementation of *vir* gene deletion  
878 mutants that showed trends from Figure S4 using different strength constitutive promoters.  
879 Transient tobacco-expressed GFP shown in log2 transformed AU is shown on the y-axis  
880 (n=64). Dashed line shows wild-type level transformation, colors of boxplots represent  
881 strength of constitutive promoters from Figure 1A.  
882

883

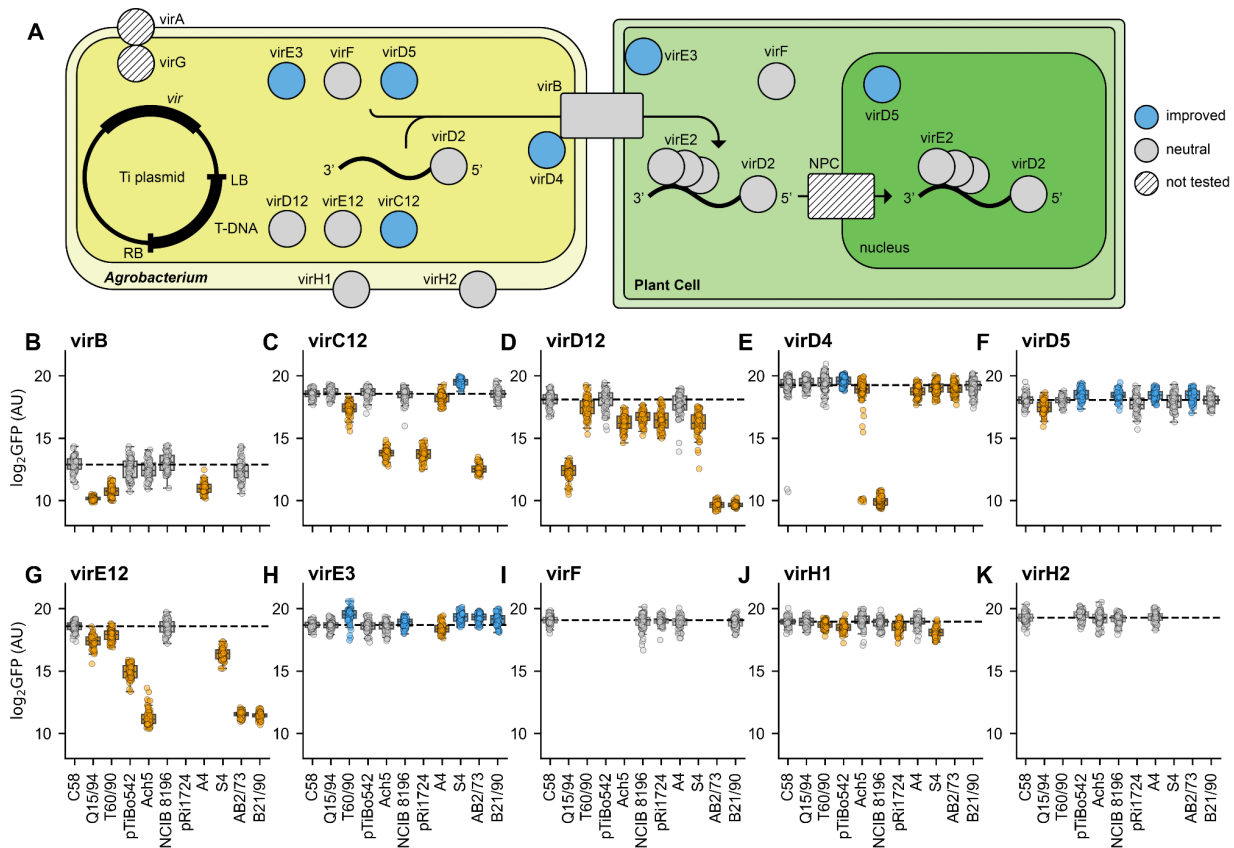

884

885

886 **Figure 3: Impact of *vir* gene allele on tobacco transformation:** A) Cartoon shows the localization  
 887 of different *vir* gene products within the bacterial and plant cell during the AMT process. Gene  
 888 products colored blue represent *vir* genes for homologs that outperformed wild-type in  
 889 complementation assays. B-K) Plots show the effects of alleles of the indicated gene clusters in  
 890 *A. fabrum* GV3101 deletion mutants complemented with constitutive promoters from a BBR1  
 891 origin plasmid. Box plots in yellow show alleles that are statistically worse than the wild-type  
 892 allele, box plots in blue show alleles that are statistically superior than the wild-type allele,  
 893 and box plots in white show alleles that are statistically indistinguishable from the wild-type allele.  
 894 Statistical significance was determined using a Bonferroni corrected T-test (p-value < 0.05,  
 895 n=64).

896

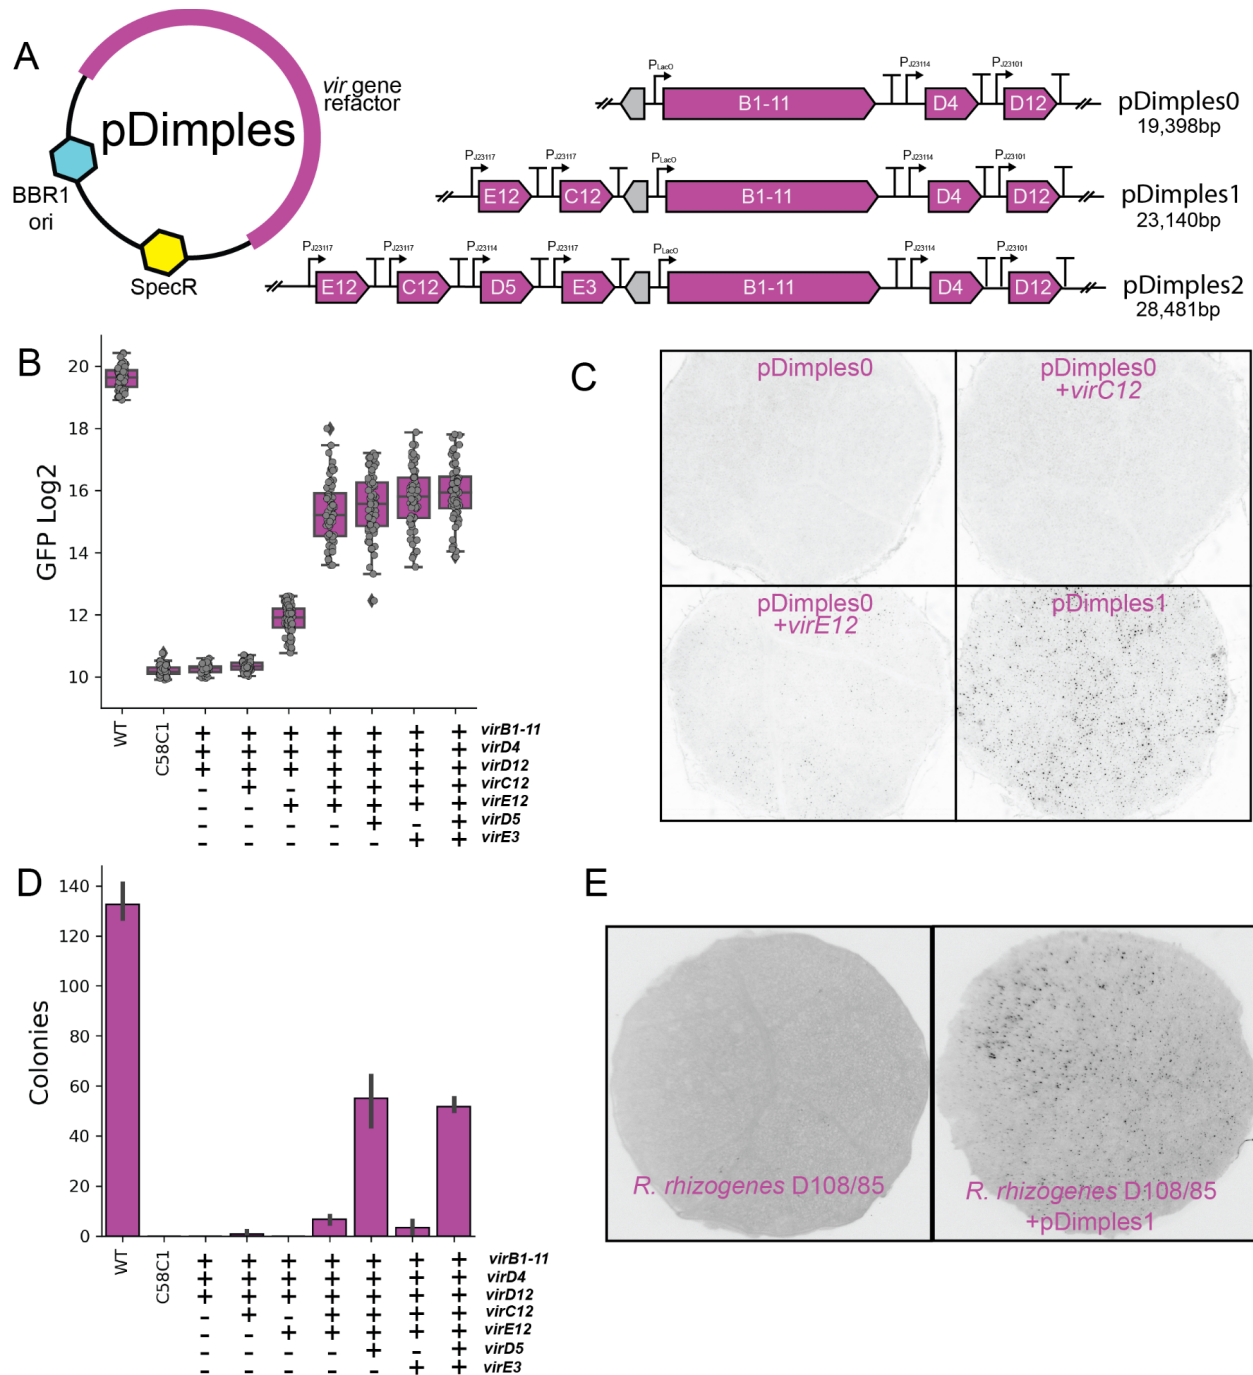

897  
 898 **Figure 4: Synthetic refactoring of pTi:** A) Genetic design of pDimples vectors. Variants of  
 899 pDimples1 that only have either *virC12* or *virE12* (pDimples0.5), as well as variants of  
 900 pDimples2 that have only *virE3* or *virD5* (pDimples1.5) were also constructed. B) GFP produced  
 901 by transient transformation of tobacco leaves via synthetic pTi plasmids harbored in *A. fabrum*  
 902 C58C1 (n=64). The Y-axis shows log<sub>2</sub> transformed GFP (AU). C) Fluorescent microscopy of  
 903 6mM tobacco leaf punches infiltrated with *A. fabrum* C58C1 harboring minimal refactored pTi

904 plasmids as well as a binary vector for the expression of a nuclear localized mScarlet. D)  
905 Transformation of *R. toruloides* by synthetically refactored pTi plasmids harbored in *A. fabrum*  
906 C58C. The average number of transformants obtained in three transformations is shown by  
907 refactored strains, as well as a wild-type strain of *A. fabrum* GV3101 and *A. fabrum* C58C1  
908 harboring a binary vector but no refactored pTi. E) Fluorescent microscopy of 6mm tobacco leaf  
909 punches infiltrated with *R. rhizogenes* D108/85 harboring a binary vector for the expression of a  
910 nuclear localized mScarlet without (top) or with (bottom) pDimples1.0.  
911
